# Supplementary material for: NK cells promote neutrophil recruitment in the brain during sepsis-induced neuroinflammation
Source: PubMed Central journal article supplement (PMC4897692; doi:10.1038/srep27711), 2016-06-08
Supplement: srep27711-s1.pdf [file srep27711-s1.pdf]

# NK cells promote neutrophil recruitment in the brain during sepsis-induced neuroinflammation

Hao He<sup>1</sup>, Tingting Geng<sup>1</sup>, Piyun Chen<sup>1</sup>, Meixiang Wang<sup>1</sup>, Jingxia Hu<sup>1</sup>, Li Kang<sup>1</sup>, Wengang Song<sup>1</sup>, \* & Hua Tang<sup>1</sup>, \*

<sup>1</sup>Institute of Immunology, Taishan Medical University, Taian, Shandong, 271000, China

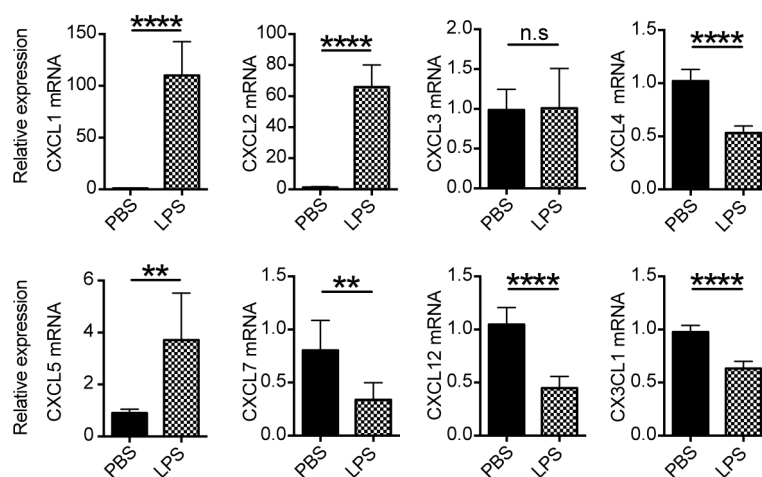

**Supplementary Fig. 1. Expression of chemokines for attracting neutrophils in the brain.** Twelve hours after LPS or PBS treatment, mRNA (n=6 per group) was extracted from the whole brain of mice. qPCR was performed to detect the expression of chemokines for attracting neutrophils. \* $P < 0.05$ , \*\* $P < 0.01$ , \*\*\* $P < 0.001$ , \*\*\*\* $P < 0.0001$ , ANOVA. Means  $\pm$  SD are shown. Data shown are representative of at least 2 independent experiments.

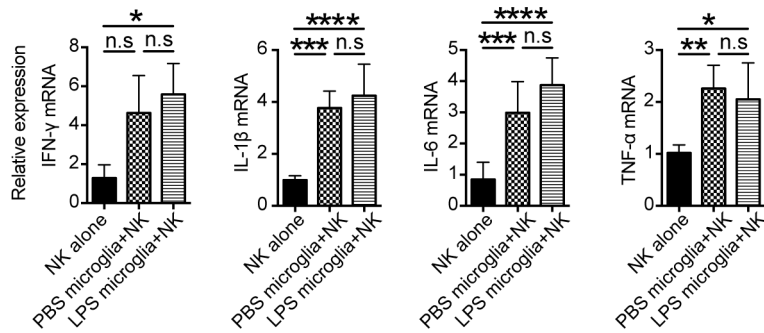

**Supplementary Fig. 2. Expression of proinflammatory cytokines by NK cells cocultured with microglia *in vitro*.** CD3<sup>+</sup>CD19<sup>-</sup>NK1.1<sup>+</sup> NK cells ( $1 \times 10^5$ ) sorted from bone marrow in naïve mice were cocultured with or without microglia ( $2 \times 10^5$ ) sorted from mice treated with PBS or LPS for 3 days. Eleven hours later, NK cells in the coculture were sorted again by flow cytometry for mRNA extraction and subsequent cytokine analysis by qPCR. \* $P < 0.05$ , \*\* $P < 0.01$ , \*\*\* $P < 0.001$ , \*\*\*\* $P < 0.0001$ , ANOVA. Means  $\pm$  SD are shown. Data shown are representative of at least 2 independent experiments.

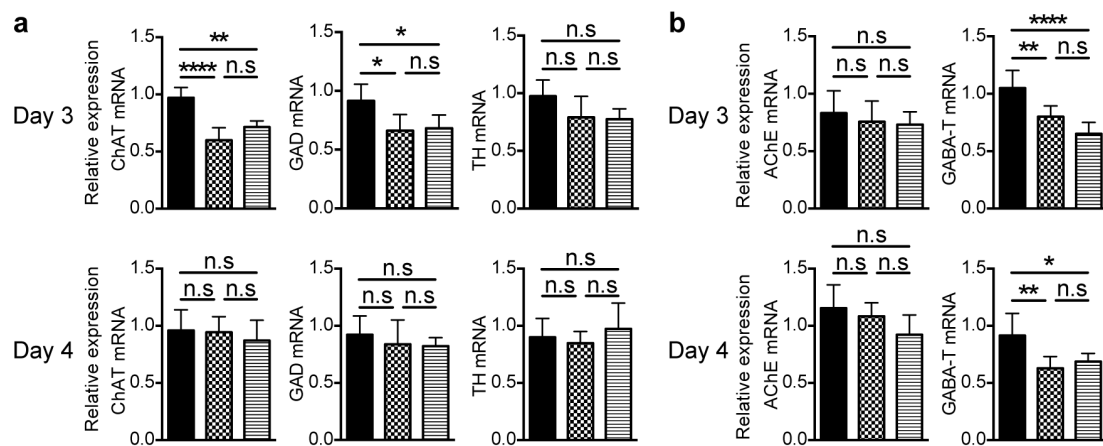

**Supplementary Fig. 3. Depletion of NK cells does not regulate the expression of rate-limiting enzymes for synthesis or degradation of acetylcholine, gamma-aminobutyric acid and catecholamine.** Mice with or without depletion of NK cells were treated with PBS or LPS for 3 and 4 days. mRNA was extracted from the whole

brain (n=4~6 per group) and used for analysis of the expression of rate-limiting enzymes for neurotransmitter synthesis and degradation by qPCR. (a) Choline acetyltransferase (ChAT) is for acetylcholine synthesis; glutamate decarboxylase forward (GAD) is for GABA synthesis; tyrosine hydroxylase (TH) is for catecholamine synthesis; (b) Acetylcholinesterase (AChE) is for acetylcholine degradation; GABA-transaminase (GABA-T) is for GABA degradation. \* $P < 0.05$ , \*\* $P < 0.01$ , \*\*\* $P < 0.001$ , \*\*\*\* $P < 0.0001$ , ANOVA. Means  $\pm$  SD are shown. All data in this figure are representative of at least 2 independent experiments.

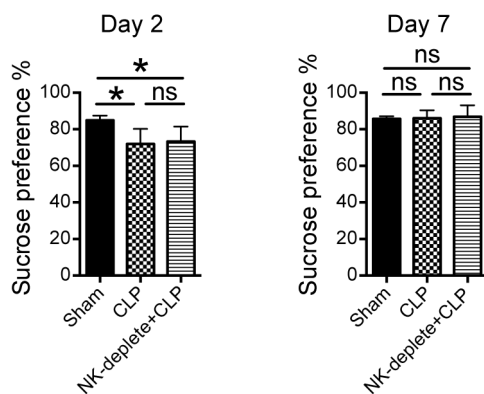

**Supplementary Fig. 4. Regulation of depression-like behavior by NK cells in low-grade CLP.** Mice with or without depletion of NK cells received surgery and were divided into sham group and low-grade CLP group. On day 2 and day 7, sucrose preference test was performed to evaluate the depression-like behavior of mice from different groups (n=8 per group). \* $P < 0.05$ , \*\* $P < 0.01$ , \*\*\* $P < 0.001$ , \*\*\*\* $P < 0.0001$ , ANOVA. Means  $\pm$  SD are shown. Data shown are representative of at least 2 independent experiments.

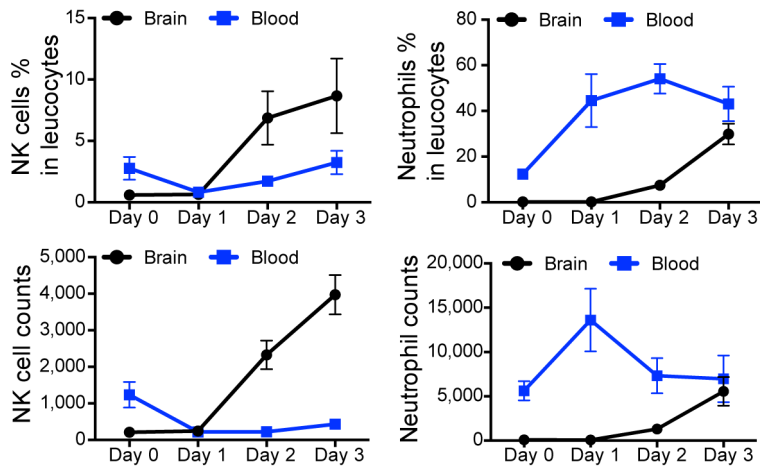

**Supplementary Fig. 5. Dynamic changes of NK cells and neutrophils in the blood and brain during LPS-induced inflammation.** At indicated time point after LPS treatment, mice (n=4 per group) were killed for assessment of NK cell and neutrophils in the blood and brain. Histogram shows the percentage and cell number of CD19<sup>-</sup>CD3<sup>-</sup>NK1.1<sup>+</sup> NK cells and CD11b<sup>+</sup>Ly6C<sup>-</sup>Gr1<sup>+</sup> neutrophils gated in CD45<sup>+</sup> leukocytes.

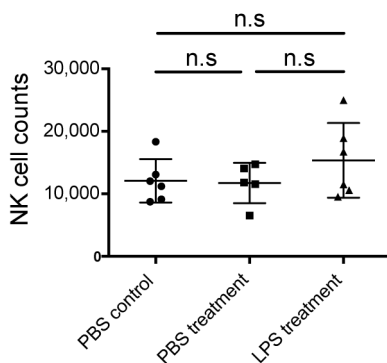

**Supplementary Fig. 6. Microglia could not attract NK cells in the early stage of neuroinflammation.** Twenty-one hours after PBS or LPS treatment, microglia ( $8 \times 10^4$ ) were sorted from brain in PBS-treated mice and LPS-treated mice. Then *in vivo* recruitment assay was performed to detect the attraction of NK cells by microglia (n=5~6, per group). ANOVA. Means  $\pm$  SD are shown. Data shown are representative of at least 2 independent experiments.

**Supplementary Table S1. Primers used for qPCR analysis**

| Gene                           | Forward Primer          | Reverse Primer          |
|--------------------------------|-------------------------|-------------------------|
| <i>Gapdh</i>                   | TGTGTCCGTCGTGGATCTGA    | TTGCTGTTGAAGTCGCAGGAG   |
| <i>Cxcl1</i>                   | TGCACCCAAACCGAAGTCAT    | CTCCGTTACTTGGGGACACC    |
| <i>Cxcl2</i>                   | CCAACCACCAGGCTACAGG     | GCGTCACACTCAAGCTCTG     |
| <i>Cxcl3</i>                   | GAAAGGAGGAAGCCCCTCAC    | ACACATCCAGACACCGTTGG    |
| <i>Cxcl4</i>                   | TGGTCCCGAAGAAAGCGATG    | TTCAGGGTGGCTATGAGCTG    |
| <i>Cxcl5</i>                   | CACTCGCAGTGGAAGAACG     | CGTGGGTGGAGAGAATCAGC    |
| <i>Cxcl7</i>                   | ATTGCAACGGAAATCGCCTG    | TGTTGCAAAGGTTGCTTGAA    |
| <i>Cxcl9</i>                   | GGAGTTCGAGGAACCCTAGTG   | GGGATTTGTAGTGGATCGTGC   |
| <i>Cxcl10</i>                  | CCAAGTGCTGCCGTCATTTTC   | GGCTCGCAGGGATGATTTCAA   |
| <i>Cxcl11</i>                  | GGCTTCCTTATGTTCAAACAGGG | GCCGTTACTCGGGTAAATTACA  |
| <i>Cxcl12</i>                  | AGAAACCTTCCACCAGAGCAG   | GCCGGATCTTGTGTTGAGTGA   |
| <i>Ccl3</i>                    | TTCTCTGTACCATGACACTCTGC | CGTGGAATCTTCCGGCTGTAG   |
| <i>Ccl4</i>                    | TTCCTGCTGTTTCTCTTACACCT | CTGTCTGCCTCTTTTGGTCAG   |
| <i>Ccl5</i>                    | GCTGCTTTGCCTACCTCTCC    | TCGAGTGACAAACACGACTGC   |
| <i>Ccl8</i>                    | TCTACGCAGTGCTTCTTTGCC   | AAGGGGGATCTTCAGCTTTAGTA |
| <i>Cx3cl1</i>                  | ACGAAATGCGAAATCATGTGC   | CTGTGTCGTCTCCAGGACAA    |
| <i>Xcl1</i>                    | TTTGTACCAAACGAGGACTAAA  | CCAGTCAGGGTATCGCTGTG    |
| <i>Il-1<math>\beta</math></i>  | GCAACTGTTCTGAACTCAACT   | ATCTTTTGGGGTCCGTCAACT   |
| <i>Il-6</i>                    | TCCAGTTGCCTTCTTGGGAC    | GTGTAATTAAGCCTCCGACTTG  |
| <i>Tnf-<math>\alpha</math></i> | ATGTCCGCTCCAGGACCTTA    | GGTAGTAAGTGTGACACCCACT  |
| <i>Ifn-<math>\gamma</math></i> | ACAGCAAGGCGAAAAAGGATG   | TGGTGGACCACTCGGATGA     |
| <i>AChE</i>                    | ACCGATACTCTGGACGAGGC    | CCTGCTTGCTATAGTGGTCG    |
| <i>ChAT</i>                    | CCATGACTGACCACAAGGCT    | TCAATGGCCATGCCGTTAT     |
| <i>TPH2</i>                    | CTGAATCCGCCTGAGAGCAT    | CCGTACATGAGGACTCGGTG    |
| <i>TH</i>                      | TACTTTGTGCGCTTCGAGGT    | GGAACCTTGTCTCTCTGCG     |
| <i>GAD</i>                     | CTGTCCCTGTGTGACAACCA    | TGGTAAGCTGCTTTGGCTCG    |
| <i>MAO-A</i>                   | GCTTATGTGGGACCAACCCA    | GGAAATGCACCACGGAATGG    |
| <i>MAO-B</i>                   | TCCACATTGACCAGACAGGG    | CTTCATGCCCAAAGCAGGTG    |
| <i>SERT</i>                    | GCGACGTGAAGGAAATGCTG    | GGAGTTGGGGTGGACTCATC    |
| <i>GABA-T</i>                  | GAACACTGGGGCTTGATGA     | TTGGCCGAAACTCCTCCTTG    |

AChE, Acetylcholinesterase; ChAT, choline acetyltransferase; TPH2, Neuronal Tryptophan hydroxylase 2; TH, tyrosine hydroxylase; GAD, Glutamate decarboxylase; MAO-A, Monoamine oxidase A; MAO-B, Monoamine oxidase B;

SERT, serotonin transporter; GABA-T, GABA-transaminase
